1 **Parallel and non-parallel divergence within polymorphic populations of brook stickleback,**  
2 ***Culaea inconstans* (Actinopterygii: Gasterosteidae)**

3

4 Kaitlyn Willerth<sup>1</sup>, Emily Franks<sup>1</sup>, and Jonathan A. Mee<sup>1\*</sup>

5

6 <sup>1</sup> Department of Biology, Mount Royal University, Calgary, Alberta, T3E 6K6, Canada.

7

8 \* Corresponding author. E-mail: [jmee@mtroyal.ca](mailto:jmee@mtroyal.ca)

9

10

11 Running title: Divergence within polymorphic brook stickleback populations

12

13

14 **Abstract**

15           Studying parallel evolution allows us to draw conclusions about the repeatability of  
16 adaptive evolution. Whereas populations likely experience similar selective pressures in similar  
17 environments, it is not clear if this will always result in parallel divergence of ecologically  
18 relevant traits. Our study investigates the extent of parallelism associated with the evolution of  
19 pelvic spine reduction in brook stickleback populations. We find that populations with parallel  
20 divergence in pelvic spine morphology do not exhibit parallel divergence in head and body  
21 morphology but do exhibit parallel divergence in diet. In addition, we compare these patterns  
22 associated with pelvic reduction in brook stickleback to well-studied patterns of divergence  
23 between spined and unspined threespine stickleback. Whereas spine reduction is associated with  
24 littoral habitats and a benthic diet in threespine stickleback, spine reduction in brook stickleback  
25 is associated with a planktonic diet. Hence, we find that pelvic spine divergence is associated  
26 with largely non-parallel ecological consequences across species.

27

28 **Keywords**

29 Adaptation, balancing selection, Gasterosteidae, pelvic spines, polymorphism, North America,  
30 trophic morphology, lakes, diet, isotopes

31

32

### 33 **Introduction**

34           Understanding the causes of adaptive phenotypic divergence is a central goal in  
35 evolutionary biology. The genetic basis of adaptive divergence has received much needed  
36 attention recently, but the ecological causes of selection on divergent phenotypes remain  
37 unknown in many cases. Whereas understanding the genetic basis of phenotypic variation is  
38 central to many questions in evolutionary biology, understanding the ecological correlates of  
39 adaptive variation is key to answering questions about the causes of selection that drive  
40 diversification. In populations with persistent adaptive phenotypic dimorphism, selection may  
41 involve several ecological factors simultaneously, including predation, competition, or  
42 parasitism, and selection driving divergence in one trait may affect divergence in other traits due  
43 to pleiotropy. Alternatively, a suite of traits may change in concert with a particular adaptive  
44 polymorphism due to plastic or evolutionary responses in resource use, habitat use, behaviour, or  
45 predator interactions that arise as a consequence of the trait polymorphism. For example, cliff  
46 nesting in some kittiwake gulls (*Rissa tridactyla* Linnaeus 1758) results in reduced predation risk  
47 and reduced predator avoidance behaviours (Cullen 1956). The diurnal life history of butterflies  
48 likely originated as a strategy to avoid bat predation and is associated with the loss of ultrasonic  
49 hearing (Yack and Fullard 2008). In threespine stickleback (*Gasterosteus aculeatus* Linnaeus  
50 1758), predators induce selection for longer protective spines, which are part of a suite of traits  
51 associated with habitat divergence within some freshwater lakes (Rennison et al. 2019). In all of  
52 these examples, predator-related differences in phenotype are associated with other ecological or  
53 behavioural differences. Sticklebacks, in particular, have emerged as a model system in the study  
54 of adaptive divergence, particularly with respect to the role of predation in driving adaptive  
55 divergence.

56 Three species in the stickleback family (Gasterosteidae), in three different genera  
57 (*Gasterosteus*, *Pungitius*, and *Culaea*), exhibit heritable variation in their pelvic or dorsal spines  
58 (Nelson 1969, Nelson 1977, Chan *et al.* 2010). There is good evidence that spines are involved,  
59 at least to some extent, in defence against predators (Hoogland *et al.* 1957, Hall 1956, Reisman  
60 and Cade 1967). For example, gape-limited predators (e.g. some birds, trout, and other small or  
61 medium-sized fishes) are deterred by spines, and these predators select for increased armor and  
62 longer spines in stickleback (Reist 1980a, Reimchen 1992, Vamosi and Schluter 2004,  
63 Marchinko 2008, Lescak and von Hippel 2011, Miller *et al.* 2017). Spined stickleback are bolder  
64 and will tolerate being closer to predators than unspined stickleback (Reist 1980a, Reist 1980b,  
65 Reist 1983). Large fish, such as pike (*Esox lucius* Linnaeus 1758), which are not gape-limited,  
66 are less deterred by armor and spines. Hence, predators that are not gape-limited likely select for  
67 spine reduction or spine loss (Nelson and Atton 1971, Andraso and Barron 1995, Leinonen *et al.*  
68 2011). Anecdotal evidence has suggested that invertebrate predators, such as dragonfly nymphs  
69 (Odonata: Anisoptera) and giant water bugs (Hemiptera: Belostomatidae), use spines and other  
70 external bony structures to grasp their prey, suggesting that invertebrates may select for spine  
71 reduction or loss (Reimchen 1980, Reist 1980b, Vamosi 2002, Lescak *et al.* 2012), but a meta-  
72 analysis of invertebrate selection experiments, found little support for selection against spines  
73 (Miller *et al.* 2017). Several other predators are known to prey on stickleback (Reimchen 1994),  
74 including loons (*Gavia immer* Brunnich 1764; Reimchen 1980), muskrats (*Ondatra zibethicus*  
75 Linnaeus 1766; Nelson 1977), and conspecific stickleback (Foster *et al.* 1988), but the influence  
76 of each of these predators on stickleback spines is difficult to predict and has not been evaluated.  
77 The evidence that predation influences selection on pelvic phenotypes in stickleback is further  
78 supported by the observation that the size of pelvic girdle and pelvic spines in stickleback is

79 proportional to the density of predatory fish in a region (Miller *et al.* 2017). Insofar as different  
80 predators use different habitats within lakes (Reimchen 1994), predator-mediated selection may  
81 drive spined and unspined stickleback into different habitats.

82 Pelvic spines have received much more attention than dorsal spines in the stickleback  
83 literature. Ancestrally, all species of stickleback had a pelvic structure composed of a pelvic  
84 girdle and two spines (Bell 1974, Ward and McLennan 2009). Loss of the pelvic spines and  
85 pelvic girdle has evolved in hundreds of populations, and many individuals have intermediate or  
86 ‘vestigial’ pelvic structures such as half a girdle with only one spine or a complete pelvic girdle  
87 with no spines (Klepaker 2013). Divergence in pelvic phenotype within stickleback populations  
88 may be associated with resource competition leading to different habitat use (Nelson 1977,  
89 Schulte 1994), but balancing selection caused by different predators that select for different  
90 traits has been implicated as the main driver of pelvic divergence within and among stickleback  
91 populations (Nelson 1969, Nelson and Atton 1971, Reimchen 1980, Reist 1980a, Reist 1980b,  
92 Reimchen 1994, Marchinko 2009). In the absence of predators, pelvic reduction is associated  
93 with low-calcium environments (Bell *et al.* 1993), but it is unlikely that variation in calcium  
94 availability among habitats within a population would be sufficient to drive within-population  
95 spine polymorphism. Populations with pelvic reduction are more often found in lakes which lack  
96 an outlet (Nelson and Atton 1971), suggesting, perhaps, that the presence of multiple habitats  
97 within a lake are required for pelvic spine divergence. Regardless of whether predation was the  
98 initial, or is the primary, cause of the pelvic phenotype divergence within stickleback  
99 populations, predators may drive different pelvic phenotypes to use different habitats within a  
100 population, and individuals that use different habitats are likely exposed to different  
101 environmental effects (see, for example, Rennison *et al.* 2019). The maintenance of within-

102 population divergence may, therefore, be dependent on multiple ecological factors, and adaptive  
103 phenotypic divergence in pelvic morphology may have consequences on a variety of ecologically  
104 relevant traits.

105         We studied populations of brook stickleback (*Culaea inconstans* Kirtland, 1840) to  
106 investigate the hypothesis that divergent pelvic phenotypes are associated with divergence in  
107 habitat. Pelvic spine polymorphism in threespine stickleback (*Gasterosteus aculeatus* Linnaeus  
108 ,1958) has been studied extensively, and, in a few well-studied cases, threespine stickleback with  
109 dimorphic pelvic phenotypes are reproductively isolated sympatric ecomorphs (McPhail 1984,  
110 Ridgeway and McPhail 1984, McPhail 1992, Schluter and McPhail 1992, Nagel and Schluter  
111 1998, Rundle et al. 2000). In the majority of polymorphic threespine stickleback populations,  
112 however, vestigial pelvic phenotypes are more abundant than either the fully spined morph or the  
113 unspined morph (Klepaker et al. 2013). In contrast, the vestigial morphs are absent or rare in  
114 most polymorphic brook stickleback populations (Nelson and Atton 1971, Nelson 1977,  
115 Klepaker et al. 2013). Also, unlike dimorphic threespine stickleback populations, pelvic  
116 phenotypes in brook stickleback populations are not reproductively isolated, but, nonetheless,  
117 have persisted over multiple generations at stable frequencies except where anthropogenic  
118 environmental disturbances have occurred (Lowey et al. 2020). Dorsal and pelvic spines in brook  
119 stickleback are longest in the southern parts of their distribution and shortest in the north (Nelson  
120 1969), whereas clinal variation in spine length is not present in threespine. An additional notable  
121 difference between brook stickleback and other stickleback species with respect to spine  
122 reduction is that there are no marine populations of brook stickleback, and, therefore, spine  
123 reduction in brook stickleback is not associated with freshwater colonization (Nelson 1969)

124 We assessed body shape variation associated with pelvic spine polymorphism in brook  
125 stickleback because organisms' body shapes can be substantially influenced by being exposed to  
126 different environments or habitats, and variation in body shape can reflect important ecological  
127 and behavioural differences among individuals (Bell and Foster 1994, Reimchen et al. 1985,  
128 Webster 2011). In addition, it is possible that the gene or genes involved in pelvic polymorphism  
129 may have pleiotropic effects on other morphological traits. We also investigated habitat  
130 divergence among brook stickleback pelvic phenotypes by analyzing stable isotope signatures. If  
131 the divergent pelvic morphs of brook stickleback use different habitats, then diet is likely to  
132 differ as a consequence. According to Cutting *et al* (2016), fish muscle biochemistry reflects a  
133 long-term average diet (over a few months) and is a good indicator of diet source. Analysis of  
134 carbon ( $\delta^{13}\text{C}$ ) and nitrogen ( $\delta^{15}\text{N}$ ) isotopes in fish tissues is a common method to evaluate  
135 variation in habitat and resource use in freshwater environments (Post 2002). Different  
136 photosynthetic organisms (e.g. plants vs phytoplankton) fix carbon isotopes in different ratios.  
137 For example, terrestrial plants tend to fix more  $^{13}\text{C}$  and, as a result, have higher  $\delta^{13}\text{C}$  values  
138 than phytoplankton. When photosynthetic organisms are consumed, their carbon isotope ratios  
139 are assimilated and reflected within consumers' tissues, and  $\delta^{15}\text{N}$  values tend to increase with  
140 trophic level due to preferential assimilation of  $^{15}\text{N}$  (Jardine et al. 2003; Eloranta et al. 2010). If  
141 phenotypically different brook stickleback forage in different habitats (e.g. limnetic vs. benthic),  
142 they may have different isotopic signatures if primary producer composition is unique to either  
143 habitat and if their diet shifts to higher-order consumers. Based on patterns of ecological  
144 divergence between spined and unspined threespine stickleback (Reimchen 1980, McPhail  
145 1992), we predict that brook stickleback with reduced pelvises will be associated with benthic or  
146 littoral habitats and will have a more benthic diet, which would lead to higher  $\delta^{13}\text{C}$  values and

147 higher  $\delta^{15}\text{N}$  values among unspined individuals. We do not, however, have a specific prediction  
148 about how body shape may change between spined and unspined brook stickleback morphs that  
149 use different habitats because, unlike diet and stable isotope signatures, morphological  
150 differences between stickleback in different habitats show little parallelism among lakes  
151 (Kaeuffer et al. 2012).

152

## 153 **Methods**

154

### 155 *Sample preparation and collection*

156 We collected adult brook stickleback from two lakes in Alberta, Canada, in 2017 and  
157 2019 (with UTF-8 encoded WGS84 latitude and longitude): Muir Lake (53.627659, -  
158 113.957524) and Shunda Lake (52.453899, -116.146192). Shunda Lake was previously known  
159 as Fish Lake (as in Nelson and Atton 1971, Nelson 1977). These lakes were selected because,  
160 among the lakes with polymorphic brook stickleback populations in the region, they had a  
161 relatively high abundance of spined and unspined pelvic morphs (Nelson 1977, Lowey et al.  
162 2020). Both lakes have fish survey and stocking records indicating the potential presence of  
163 several stickleback predators, including brown trout (*Salmo trutta* Linnaeus 1758), rainbow trout  
164 [*Ocorhynchus mykiss* (Walbaum 1792)], brook trout (*Salvelinus fontinalis* Mitchill 1814),  
165 northern pike (*Esox lucius* Linnaeus 1758), and yellow perch [*Perca flavescens* (Mitchill, 1814)],  
166 although recent surveys and stocking records (i.e. since 1990) list only rainbow trout and brown  
167 trout, suggesting that these salmonids are likely the dominant predatory fish (Alberta  
168 Environment and Parks 2021). In Muir Lake, brook stickleback also coexist with fathead  
169 minnow [*Pimephales promelas* (Rafinesque, 1820)], whereas in Shunda Lake the fish



170 community includes longnose sucker (*Catostomus catostomus* Forster 1773), white sucker  
171 [*Catostomus commersonii* (Lacépède 1803)], and northern pearl dace [*Margariscus nachtriebi*  
172 (Cox 1896)]. We observed loons [*Gavia immer* (Brunnich 1764)], dragonfly nymphs  
173 (Gomphidae and other unidentified families), giant water bugs [*Lethocerus americanus* (Leidy  
174 1847)], and backswimmers (Notonectidae) at both lakes. The distributions and abundances of  
175 stickleback predators and competitors across habitats in these lakes has not been evaluated. Muir  
176 lake has a maximum depth of 6.5m, water conductivity of 236 $\mu$ S/cm, and pH of 8.7 (measured in  
177 the summer with water temperature of 18 degrees C), and, although undeveloped native  
178 woodlands and residential development surround the lake, the predominant land use in the area is  
179 agriculture (Alberta Environment and Parks 2021). Shunda Lake has a maximum depth of 6.2m,  
180 water conductivity of 264.5 $\mu$ S/cm, and pH of 8.6 (measured in the summer with water  
181 temperature of 16 degrees C), and is surrounded entirely by native woodland (Alberta  
182 Environment and Parks 2021). Shunda Lake has an outlet stream, whereas Muir Lake does not.

183 Brook stickleback were collected in June and July using unbaited minnow traps (5 mm  
184 mesh). To sample brook stickleback from the littoral zone, traps were set adjacent to the shore at  
185 0.5-2 m depths. To sample brook stickleback from the limnetic zone, traps were set at least 50 m  
186 from shore and suspended from floats at a depth of 1-2m. Traps were retrieved one to twelve  
187 hours after being set. All brook stickleback samples were anesthetized and euthanized in an  
188 overdose mixture of lake water and eugenol. In 2019, the posterior portion (posterior to the  
189 pelvic girdle) of each individual from Muir Lake and Shunda Lake was frozen on dry ice then  
190 preserved at -20°C for stable isotope analysis. All other tissues were preserved in 70% EtOH for  
191 morphometric analysis. Samples were collected under a fisheries research license issued by the  
192 Government of Alberta. Collection methods and the use of animals in research was approved by

193 the Animal Care Committee at Mount Royal University (Animal Care Protocol ID 101029 and  
194 101795). Spined and unspined individuals were initially identified at the site of capture based on  
195 close visual inspection and prodding with fine-tipped tweezers. Sex was also assigned at the site  
196 of capture by examining gonads and by noting the presence of nuptial colouration. In 2019,  
197 benthic invertebrates were collected from the littoral zones of Muir Lake and Shunda Lake by  
198 rinsing and sorting through mud samples, and plankton was collected from the pelagic zone of  
199 these two lakes using a Wisconsin Plankton Sampler. Benthic invertebrates were identified to  
200 family or species (if possible) immediately after capture. Plankton and benthic invertebrate  
201 samples were frozen on dry ice immediately, then preserved at -20°C for stable isotope analysis.

202

### 203 *Geometric Morphometrics*

204 The brook stickleback specimens were bleached and dyed using alizarin red following the  
205 protocol from Xie *et al.* (2019). After bleaching and staining, we captured ventral and left-lateral  
206 photographs of each fish against a 1x1cm grid using a Canon EOS Rebel T6i mounted above  
207 each specimen at a height of 15 cm with two SV SlimPanel LED high-intensity illuminators. We  
208 verified the pelvic phenotype for each individual by examining the ventral photograph, and,  
209 following Kepakker *et al.* (2013), each individual was classified as having a “normal pelvis” with  
210 a complete pelvic girdle and both spines (hereafter “spined”), a “lost pelvis” with complete  
211 absence of pelvic girdle and spines (hereafter “absent”), or a “vestigial pelvis” wherein one or  
212 more spines or pelvic girdle elements (the ascending branch, anterior process, or posterior  
213 process) is missing. The population from Muir Lake contains very few vestigial pelvic  
214 phenotypes (2 to 3% of the population), and, to allow comparisons across populations, we  
215 combined the absent and vestigial pelvic phenotypes into a single category that we called

216 “reduced”. Analyses involving the three pelvic phenotypes (i.e., spined, vestigial, and absent)  
217 were not possible in all instances (i.e. due to the lack of vestigial individuals in Muir Lake  
218 samples), and, when they were possible, did not yield substantial differences in statistical results  
219 or overall conclusions relative to the analyses with two categories (i.e. spined and reduced)  
220 presented below. Specimens that were severely bent or distorted, and those whose pectoral fins  
221 obscured their operculum, were excluded from the analysis. Landmarks placed on the left-lateral  
222 photos were used to build a Tps file using tpsUtil version 1.79 (Rohlf, 2019).

223 To quantify two-dimensional body shape, we digitized 27 anatomical landmarks on each  
224 of the left-lateral photographs using tpsDIG2w32, version 2.31 (Rohlf, 2018). The landmark  
225 selection was based on previously established landmarks (Krisjansson 2005, Taugbol 2014). All  
226 landmarks were visible from the lateral side of the fish (Figure 1). The number of dorsal spines  
227 varies among individuals and populations from four to six (Nelson 1969). For this reason, instead  
228 of recording the location of each dorsal spine, the location of the first and last dorsal spine were  
229 used as landmarks. In case the dorsal spine landmarks are, in fact, not homologous, we also  
230 analyzed whole-body shape data without the posterior dorsal spine landmark and without any  
231 dorsal spine landmarks. Regardless, for samples collected in 2019, it was only possible to place  
232 landmarks on the head (see Figure 1) because the posterior portion of each fish (i.e. posterior to  
233 the pelvic girdle) was destroyed for use in the stable isotope analysis. Hence, whole-body  
234 morphometric analysis used only samples collected in 2017, whereas analysis of head  
235 morphology used samples from 2017 and 2019.

236

237 *Stable Isotope Analysis*

238 Stickleback, zooplankton, and benthic macroinvertebrate tissues collected in 2019 were  
239 thawed then rinsed with distilled H<sub>2</sub>O to clean off any lake-debris or mud. We then dried each  
240 sample at 65°C for 48 hrs in an incubator oven, ground it into a powder in liquid nitrogen using a  
241 mortar and pestle, then packed the ground tissue into 4 x 6 mm tin capsules for isotope analysis.  
242 Stable isotope analysis was performed on the packed capsules using a Carbon and Nitrogen Ratio  
243 Mass Spectrophotometer at the University of Calgary Geosciences Isotope Analysis Laboratory.  
244 Stable isotope ratios are expressed as a delta notation ( $\delta$ ) which is defined as the parts per  
245 million (‰) difference from a universal standard (Zanden *et al.* 1999). The standard material for  
246  $\delta^{13}\text{C}$  is Pee Dee belemnite (PDB) limestone, and for  $\delta^{15}\text{N}$  it is atmospheric nitrogen (both ‰  
247 values arbitrarily set at 0 ‰; Zanden *et al.* 1999, Ben-David and Flaherty 2012). To assess  
248 accuracy and repeatability of our isotope ratio measurements, we recorded triplicate or duplicate  
249 isotope measurements for 22.5% of samples (including all plankton samples).

250

### 251 *Statistical Analysis*

252 To evaluate the hypothesis that pelvic phenotype is associated with other morphological  
253 changes, we assessed shape variation between pelvic phenotypes using the GEOMORPH  
254 package in R (Adams and Collyer 2020). We first performed a Generalized Procrustes analysis  
255 to estimate a scaling factor that compensated for the natural variation in fish size and applied this  
256 to all samples. This assured that all landmarks from the samples were placed on comparable  
257 locations and avoided wide dispersion of landmark coordinates. We used the `procD.lm` function  
258 to conduct Procrustes ANOVA (with type III sums of squares to allow for unbalanced data – see  
259 Table 1), which uses a linear model to evaluate the morphological variation attributable to the  
260 following factors: lake, sex, year, pelvic phenotype, and body size. We expected that the effect of

261 pelvic phenotype on morphology might be different between lakes or between sexes, and that the  
262 effect may be influenced by allometry (Aguirre et al. 2008, Reimchen et al. 2016). So, we  
263 included two-way interactions in our linear model. The probability of the observed effect for  
264 each factor was evaluated by comparison to a null distribution generated by 10,000 resampling  
265 permutations. We used a reverse stepwise approach for model selection, starting with the full  
266 model (main effects and two-way interactions) and removing any body size (i.e. allometric)  
267 interaction terms that were not significant.

268         We performed a visual evaluation of variation in isotopic signatures among fish,  
269 plankton, and benthic macroinvertebrate samples using a bi-plot of  $\delta^{15}\text{N}$  and  $\delta^{13}\text{C}$  signatures.  
270 To evaluate the hypothesis that the spined and unspined brook stickleback pelvic phenotypes use  
271 different habitats and forage on different food sources, we tested the association of sex, lake,  
272 pelvic phenotype, and fish size with  $\delta^{15}\text{N}$  and  $\delta^{13}\text{C}$  signatures using generalized linear models  
273 with gaussian error distributions. We expected that the association between pelvic phenotype and  
274 isotope signatures might be different between lakes or between sexes, and that the association  
275 may be influenced by allometry (Reimchen et al. 2016). So, as with the analysis of  
276 morphological variation, we included two-way interactions in our model. We set contrasts  
277 among factors using the `contr.sum` function, and we used the CAR package (Fox and Weisberg  
278 2019) to generate an ANOVA table (with type III sums of squares to allow for unbalanced data –  
279 see Table1) to evaluate the variation in  $\delta^{15}\text{N}$  and  $\delta^{13}\text{C}$  signatures attributable to each factor and  
280 their interactions terms. We used a reverse stepwise approach for model selection, starting with  
281 the full model (main effects and two-way interactions) and removing any body size (i.e.  
282 allometric) interaction terms that were not significant. In addition, to avoid over-fitting our  
283 model (with a sample size of only 105 brook stickleback  $\delta^{15}\text{N}$  and  $\delta^{13}\text{C}$  isotope signatures), we

284 further reduced the number of interaction terms in our analyses of stable isotope variation by  
285 removing any two-factor interactions that were not significant.

286

## 287 **Results**

288 A complete summary of all samples analyzed in this study, categorized by year, lake,  
289 habitat, sex, and pelvic phenotype, is presented in Table 1. We caught no fish in the limnetic  
290 zone in Shunda Lake. The limnetic-caught fish from Muir Lake were significantly smaller than  
291 littoral-caught fish (two-sided  $t = -2.618$ ,  $df = 53.437$ ,  $p = 0.01148$ ), and we only caught three  
292 female fish in the Muir Lake limnetic zone – none of which were spined. We excluded limnetic-  
293 caught fish from subsequent statistical analyses.

294

## 295 *Morphology*

296 We organized our analyses of morphological variation based on which landmarks were  
297 available among samples from different years: one analysis involving sixteen head-only  
298 landmarks that were present in all samples (from 2017 and 2019: number of observations = 295),  
299 and one analysis involving all twenty-seven landmarks, some of which (i.e. posterior to the  
300 pelvic girdle) were not present in 2019 samples because of destructive sampling for stable  
301 isotope analysis (number of observations = 179). For simplicity, Figure 2 shows only the whole-  
302 body morphological associations. Brook stickleback head-body morphology was significantly  
303 associated with fish size and differed significantly between sexes (2017 whole-body: Table 2;  
304 2017-2019 heads only: Table 3). In addition, head morphology varied significantly among years  
305 (Table 3). Females had more elongated abdominal regions, narrower bodies, and shorter heads,  
306 which is a pattern observed in threespine stickleback as well (Aguirre et al. 2008). The

307 association between pelvic phenotype and head-body morphology was different in each lake. In  
308 Muir Lake, pelvic reduction was most-noticeably associated with a deeper body, larger head, and  
309 anterior-shifted pectoral fins, whereas in Shunda Lake, pelvic reduction was associated with a  
310 compression of the ventral portion of the head (including a less up-curved mouth), posterior-  
311 shifted pectoral fins, and a longer, narrower body (Figure 2). These patterns are consistent with  
312 our hypothesis that brook stickleback morphology is affected by pelvic phenotype, and these  
313 results are consistent with previous observations that morphological divergence is non-parallel  
314 (Kaeuffer et al. 2012).

315

#### 316 *Stable isotopes*

317 In both lakes, brook stickleback had higher  $\delta^{15}\text{N}$  isotopic signatures than benthic  
318 invertebrates (Figure 3) suggesting that, as expected, fish occupy a higher trophic niche relative  
319 to the macroinvertebrates. In Shunda Lake, the plankton had the lowest  $\delta^{15}\text{N}$  signature (Figure  
320 3) suggesting the expected hierarchy in trophic position, with fish at the top, plankton at the  
321 bottom, and macroinvertebrates in the middle. In Muir Lake, the  $\delta^{15}\text{N}$  isotopic signature was not  
322 substantially lower than the average for macroinvertebrates, but the  $\delta^{13}\text{C}$  signature for plankton  
323 in Muir Lake was substantially higher than any of the other samples. The higher-than-expected  
324  $\delta^{13}\text{C}$  signature and higher-than-expected  $\delta^{15}\text{N}$  signature for plankton in Muir Lake is an  
325 unexpected result, and further investigation is needed for a satisfactory explanation.

326 Stickleback  $\delta^{13}\text{C}$  isotope signatures were significantly associated with fish size (Table  
327 4), but none of the interactions terms with fish size were significant. This suggests that the effect  
328 of size on  $\delta^{13}\text{C}$  signature is the same regardless of pelvic phenotype, sex, or lake. The  
329 association between pelvic phenotype and  $\delta^{13}\text{C}$  signature was different in each lake, and Muir

330 Lake had a much higher  $\delta^{13}\text{C}$  signature than Shunda Lake (Table 4, Figure 3). In Muir Lake,  
331 pelvic reduction was associated with a higher  $\delta^{13}\text{C}$  signature, whereas in Shunda Lake, pelvic  
332 reduction was associated with a lower  $\delta^{13}\text{C}$  signature (Figure 4). In both lakes, however, the  
333 shift in brook stickleback  $\delta^{13}\text{C}$  signature associated with pelvic reduction was towards the  
334 planktonic  $\delta^{13}\text{C}$  signature (Figure 3). In Muir Lake, limnetic-caught fish tended to have a higher  
335  $\delta^{13}\text{C}$  signature than littoral-caught fish (Figure 3). These patterns are consistent with our  
336 hypothesis that brook stickleback with different pelvic phenotypes forage in different habitats,  
337 but these patterns are inconsistent with our prediction that, as in threespine stickleback, pelvic  
338 reduction would be associated with littoral or benthic habitats. In fact, contrary to our prediction,  
339 these results suggest that pelvic reduction is associated with limnetic (or planktonic) feeding in  
340 both lakes.

341         The effect of size on stickleback  $\delta^{15}\text{N}$  isotopic signature was dependent on lake (Table  
342 5). In Muir Lake, larger fish had a lower  $\delta^{15}\text{N}$  isotopic signature, whereas larger fish had a  
343 higher  $\delta^{15}\text{N}$  isotopic signature in Shunda Lake (Figure 5). The effect of pelvic phenotype on  
344 stickleback  $\delta^{15}\text{N}$  isotopic signature was dependent on sex. In males, pelvic reduction is  
345 associated with a higher  $\delta^{15}\text{N}$  signature, whereas pelvic reduction is associated with a lower  
346  $\delta^{15}\text{N}$  signature in females (Figure 5). These patterns are consistent with our hypothesis that  
347 brook stickleback pelvic morphs forage in different habitats.

348

## 349 **Discussion**

350         The hypothesis that pelvic spine polymorphism in brook stickleback is associated with  
351 divergence in habitat use was supported by our results. Based on carbon isotope signatures,  
352 brook stickleback with pelvic reduction (i.e. with either no pelvic structure or a vestigial pelvic



353 structure) likely feed on planktonic as opposed to benthic macroinvertebrate food sources and,  
354 therefore, likely use more limnetic as opposed to littoral or benthic habitat. This result is,  
355 however, contrary to our prediction based on the well-established association between pelvic  
356 reduction and benthic habitats in threespine stickleback (Reimchen 1980, McPhail 1992). There  
357 were also significant changes in head and body morphology associated with pelvic reduction,  
358 but, as expected (Kaeuffer et al. 2012), the specific nature of this morphological difference was  
359 lake dependent, and the magnitude of the morphological difference between pelvic phenotypes  
360 was small. In fact, the proportion of the variation in morphology,  $\delta^{13}\text{C}$  isotope signature, or  
361  $\delta^{15}\text{N}$  signature attributable to pelvic spine variation was small relative to individual-level  
362 variation and between-lake variation (Figures 3 and 4, Tables 2, 3, 4, and 5).

363         There is ample evidence supporting the role of stickleback pelvic spines in predator  
364 interactions. It is likely that balancing selection driven by multiple and varied predators is  
365 involved in maintaining the spine polymorphism, and that predation drives associations between  
366 spine morphology and diet, habitat, and body morphology. But, we do not know the mechanism  
367 via which predation and other ecological factors cause the unexpected association between pelvic  
368 reduction and a more planktonic diet (as opposed to the predicted association between pelvic  
369 reduction and a more benthic diet). It is possible that, in these systems, stocked trout (or other  
370 gape-limited predatory fish) forage in littoral zones, thereby selecting for spined stickleback in  
371 these habitats. Stocked rainbow trout have been observed ambushing minnows from under  
372 floating docks in the littoral zones of other nearby lakes (J. Mee personal observation).

373         We found that, in unspined fish only, males had significantly higher  $\delta^{15}\text{N}$  signatures  
374 than females. This suggests that unspined females occupy a lower trophic position than unspined  
375 males, which may indicate that unspined females have a more planktivorous diet, whereas

376 unspined males have a more benthic diet. This is consistent with patterns observed in male  
377 threespine stickleback, which are more benthic-associated than female threespine stickleback as  
378 a consequence of their breeding behaviour (Spoljaric and Reimchen 2008, Aguirre and Akinpelu  
379 2010, McGee and Wainwright 2013). Male threespine stickleback migrate from the limnetic to  
380 the littoral habitats to build nests, spawn, and defend their eggs. Brook stickleback also build  
381 nests and defend their eggs, but, whereas threespine stickleback build their nests on the substrate,  
382 brook stickleback males build nests on vertical rocky surfaces or vegetation (Reisman and Cade  
383 1967, McLennan 1995). Hence, it is not clear that the breeding behaviour of brook stickleback  
384 males should cause them to be more benthic-associated than females. Also, if the difference in  
385  $\delta^{15}\text{N}$  signature between unspined males and females is due to male breeding behaviour, it is not  
386 clear why spined males do not have a higher  $\delta^{15}\text{N}$  signature than spined females unless the  
387 breeding behaviour of spined and unspined males is different. It seems likely that differences  
388 between brook stickleback and threespine stickleback life history and reproductive behaviour  
389 obscure any simple comparison between the species regarding the interactions among diet,  
390 habitat, and morphology.

391 Morphological variation among threespine stickleback populations is associated with  
392 habitat specialization (Reimchen et al. 1985, Webster 2011). Even subtle changes in body  
393 morphology can be associated with fitness parameters like foraging patterns, body condition, and  
394 growth rate (Webster et al. 2011). Different selection pressures in different habitats may favour  
395 different morphological traits (Reimchen et al. 1985). If traits that are well-adapted for a certain  
396 environment are ill-suited for another, there may be fitness trade-offs among habitats (Webster et  
397 al. 2011). The morphological variation among pelvic phenotypes may be due to differing water  
398 depth, water chemistry (e.g. pH), predation risk, and parasite prevalence in different habitats

399 (Reimchen et al. 1985, Webster 2011). There is, therefore, good reason to assume that  
400 differences in habitat use and diet between spined and unspined brook stickleback cause the  
401 observed morphological differences between morphs in the present study. However, it is not  
402 clear if the morphological differences between spined and unspined brook stickleback constitute  
403 a plastic response or a heritable response to divergent habitat use. Additionally, if the  
404 morphological divergence is heritable, we do not know whether it has functional significance  
405 driven by different selective regimes in different habitats, or if it results from pleiotropic effects  
406 of the genes underlying the pelvic divergence.

407         There was an obvious difference in  $\delta^{13}\text{C}$  signature between the population in Muir Lake  
408 and the population in Shunda Lake. This could be the result of different diet preferences between  
409 populations (Jardine *et al.* 2003, Eloranta et al. 2010), or it may reflect chemical differences in  
410 the environment (e.g. weather, sediment, or human impact, pH). Muir Lake is in Alberta's  
411 Central Parkland natural region, which is a prairie landscape, and its riparian area is dominated  
412 by marsh vegetation such as cattails (*Typha* spp.) and sedges (*Carex* spp.), and likely has  
413 relatively high pH (AWA 2020). Shunda Lake is in the Upper Foothills natural region, which is  
414 mountainous, and its riparian area is characterized by conifer stands and understory shrubs, and  
415 likely has relatively low pH (AWA 2020, Ross and Kyba 2015). This difference between lakes  
416 may be a reason for the difference in isotopic signatures among the plankton and invertebrate  
417 samples in these two lakes and may represent an ecological basis for the differences in  
418 morphology and isotopic signature between these two brook stickleback populations.

419         The isotopic signatures of brook stickleback, benthic invertebrates, and zooplankton  
420 relative to one another (Figure 3) were generally consistent with the linear ascending relationship  
421 of  $\delta^{15}\text{N}$  in food-web and trophic position studies of freshwater fish and their food sources (Post

422 2002). The zooplankton signature from Muir Lake did not, however, fit neatly within this  
423 paradigm. We lack any evidence to support an explanation for this unexpected isotopic signature  
424 in Muir Lake, but we can offer some conjecture. It is possible that Muir lake, at the time of  
425 sampling, was dominated by a single species or relatively few species of zooplankton (n.b. we  
426 did not identify zooplankton to species in our study). The expectation that zooplankton should  
427 have a lower  $\delta^{15}\text{N}$  and a higher  $\delta^{13}\text{C}$  isotopic signature than their consumers (Post 2002)  
428 assumes an average isotopic signature among a community of zooplankton. If our sample  
429 constituted only a few species (or even a single species), it may have been a species with a  
430 particularly  $^{15}\text{N}$ -enriched and  $^{13}\text{C}$ -enriched isotopic signature. Further sampling and analysis of  
431 isotopic signatures in this lake would be required to explain this result.

432         The observation of significant differences in morphology and stable isotope signature  
433 between lakes suggests another future avenue of inquiry. If differences between lakes are  
434 heritable, there may be implications related to parallelism in the evolution of pelvic spine  
435 reduction. It is unknown whether the genetic basis of pelvic spine polymorphism is the same in  
436 all brook stickleback populations. If differing body morphologies between lakes are associated  
437 with different genetic bases for pelvic reduction in different lakes (e.g. via pleiotropy), there may  
438 be less phenotypic and genetic parallelism in this system than previously assumed. Investigations  
439 of the heritability and genetic bases of polymorphism in these lakes are ongoing.

440

#### 441 **Acknowledgments**

442         Three anonymous reviewers provided insightful and constructive comments on a  
443 previous version of this manuscript. Jim Reist provided feedback on an earlier draft of this  
444 manuscript. Arianne Albert and Mike Rennie provided feedback on statistical methods. Mike

445 Rennie and Olivier Morrissette provided input on the collection and analysis of stable isotope  
446 data. We would like to thank Melanie Rathburn, Dorothy Hill, and Matthew Swallow for their  
447 guidance, encouragement, and constructive feedback throughout the project. Special thanks to  
448 everyone who participated in sample collection: Alex Farmer, Carolyn Ly, Alyce Straub, Bryce  
449 Carson, Moroni Lopez Vasquez, and Kaylee Olszewski. Steven Taylor at the University of  
450 Calgary Geosciences Isotope Analysis Laboratory trained EF in stable isotope sample  
451 preparation and analysis, and assisted with the isotope data collection. This work was supported  
452 by a grant from the Institute for Environmental Sustainability at Mount Royal University, and by  
453 a Research Grant from the Office of Research, Scholarship, and Community Engagement. An  
454 NSERC Discovery Grant awarded to JAM supported this work, and KW was supported by an  
455 NSERC URSA.

456

#### 457 **Shared Data**

458 All data and analysis scripts have been uploaded to the Dryad Data repository:

459 <https://datadryad.org/stash/share/Vho8zW5Aqhj5yACQtLSKf0Dm9BWcpGXIHlIVJshTeQ0>

460 **References**

461

462 Adams, D. C., Collyer, M. L., and Kaliontzopoulou. 2020. *Geomorph: software for geometric*  
463 *morphometrics*. R package (Version 3.2.1). <https://cran.r-project.org/package=geomorph>.

464

465 Aguirre, W. E., & Akinpelu, O. (2010). Sexual dimorphism of head morphology in three-spined  
466 stickleback *Gasterosteus aculeatus*. *Journal of Fish Biology*, 77(4), 802-821.

467

468 Aguirre, W.E., K.E. Ellis, M. Kusenda, and M.A. Bell. 2008. Phenotypic variation and sexual  
469 dimorphism in anadromous threespine stickleback: implications for postglacial adaptive  
470 radiation. *Biological Journal of the Linnean Society* 95:465-478

471

472 Alberta Environment and Parks. (Accessed 2021, June 1). Fish and Wildlife Information  
473 Management System. [https://www.alberta.ca/fisheries-and-wildlife-management-](https://www.alberta.ca/fisheries-and-wildlife-management-information-system-overview.aspx)  
474 [information-system-overview.aspx](https://www.alberta.ca/fisheries-and-wildlife-management-information-system-overview.aspx)

475

476 Alberta Wilderness Association (AWA). (Accessed 2020, March 31). Parkland Natural Region:  
477 [albertawilderness.ca/issues/wildlands/parkland/#parentHorizontalTab2](http://albertawilderness.ca/issues/wildlands/parkland/#parentHorizontalTab2)

478

479 Andersson, J. 2003. Effects of diet-induced resource polymorphism on performance in arctic  
480 charr (*Salvelinus alpinus*). *Evolutionary Ecology Research*, 5(2) , 213-228.

481

- 482 Andraso, G.M. 1997. A comparison of startle response in two morphs of the brook stickleback  
483 (*Culaea inconstans*): Further evidence for a trade-off between defensive morphology and  
484 swimming ability. *Evolutionary Ecology* 11, 83–90.
- 485
- 486 Bell, M. A. (1974). Reduction and loss of the pelvic girdle in *Gasterosteus* (Pisces): a case of  
487 parallel evolution. Natural History Museum of Los Angeles County Contributions in  
488 Science, 257, 1-36.
- 489
- 490 Bell, M. A., & Foster, S. A. (Eds.). (1994). The evolutionary biology of the threespine  
491 stickleback. Oxford University Press, Oxford, UK.
- 492
- 493 Bell, M. A., Orti, G., Walker, J., and Koenings, J. 1993. Evolution of Pelvic Reduction in  
494 Threespine Stickleback Fish: A Test of Competing Hypotheses. *Evolution*, 47(3), 906-914.
- 495
- 496 Ben-David, M., and E. A. Flaherty. 2012. Stable isotopes in mammalian research: A beginner's  
497 guide. *Journal of Mammalogy* 93(2):312–328.
- 498
- 499 Chan, Y. F., Marks, M. E., Jones, F. C., Villarreal, G., Jr, Shapiro, M. D., Brady, S.  
500 D., Southwick, A. M., Absher, D. M., Grimwood, J., Schmutz, J., Myers, R. M., Petrov, D.,  
501 Jónsson, B., Schluter, D., Bell, M. A., and Kingsley, D. M. 2010. Adaptive evolution of  
502 pelvic reduction in sticklebacks by recurrent deletion of a *Pitx1* enhancer. *Science*,  
503 327(5963), 302–305.
- 504

- 505 Cullen, E. (1957). Adaptations in the Kittiwake to cliff-nesting. *Ibis*, 99(2), 275-302.
- 506
- 507 Cutting, K. A. Cross, W. F., Anderson, M. L., and Reese, E. G. 2016. Seasonal change in trophic  
508 niche of adfluvial Arctic grayling (*Thymallus arcticus*) and coexisting fishes in a high-  
509 elevation lake system. PLoS ONE. 11(5) , e0156187.
- 510
- 511 Eloranta, A. P., Kahilainen, K. K., & Jones, R. I. (2010). Seasonal and ontogenetic shifts in the  
512 diet of Arctic charr *Salvelinus alpinus* in a subarctic lake. *Journal of fish biology*, 77(1),  
513 80-97.
- 514
- 515 Hall, M. F. 1956. A comparative study of the reproductive behaviour of the sticklebacks  
516 (*Gasterosteidae*). Ph.D. Thesis. St. Hugh's College, Oxford. 370 p.
- 517
- 518 Hoogland, R., Morris, D., and Tinbergen, N. 1957. The spines of sticklebacks (*Gasterosteus* and  
519 *Pygosteus*) as means of defence against predators (*Perca* and *Esox*). *Behaviour*, 10: 205-  
520 236.
- 521
- 522 Jardine, T.D., S.A. McGeachy, C.M. Paton, M. Savoie, and R.A. Cunjak. 2003. Stable isotopes in  
523 aquatic systems: Sample preparation, analysis, and interpretation. Canadian Manuscript  
524 Report of Fisheries and Aquatic Science, No. 2656: 39 p.
- 525



- 526 Jakubavičiūtė, E., Bergström, U., Eklöf, J.S., Haenel, Q., and Bourlat, S. J. 2017. DNA  
527 metabarcoding reveals diverse diet of the three-spined stickleback in a coastal ecosystem.  
528 PLoS ONE, 12(10), e0186929.  
529
- 530 Kaeuffer, R., Peichel, C. L., Bolnick, D. I., & Hendry, A. P. (2012). Parallel and nonparallel  
531 aspects of ecological, phenotypic, and genetic divergence across replicate population pairs  
532 of lake and stream stickleback. *Evolution*, 66(2), 402-418.  
533
- 534 Klepaker, T., Østbye, K., and Bell, M. A. 2013. Regressive evolution of the pelvic complex in  
535 stickleback fishes: a study of convergent evolution. *Evolutionary Ecology Research*, 15(4),  
536 413-435.  
537
- 538 Kristjansson, B. K. 2005. Rapid morphological changes in threespine stickleback, *Gasterosteus*  
539 *aculeatus*, in freshwater. *Environmental Biology of Fishes*, 74, 357–363.  
540
- 541 Lowey, J., Cheng, Q., Rogers, S. M., & Mee, J. A. (2020). Persistence of pelvic spine  
542 polymorphism in a panmictic population of brook stickleback (*Culaea inconstans*) in  
543 Alberta, Canada. *Canadian Journal of Zoology*, 98(10), 643-649.  
544
- 545 McGee, M. D., & Wainwright, P. C. (2013). Sexual dimorphism in the feeding mechanism of  
546 threespine stickleback. *Journal of Experimental Biology*, 216(5), 835-840.  
547

548 McLennan, D. A. (1995). Male mate choice based upon female nuptial coloration in the brook  
549 stickleback, *Culaea inconstans* (Kirtland). *Animal Behaviour*, 50(1), 213-221.

550

551 McPhail, J. D. 1984. Ecology and evolution of sympatric sticklebacks (*Gasterosteus*):  
552 morphological and genetic evidence for a species pair in Enos Lake, British Columbia.  
553 *Canadian Journal of Zoology*, 62, 1402–1408.

554

555 McPhail, J. D. 1992. Ecology and evolution of sympatric sticklebacks (*Gasterosteus*): evidence  
556 for a species-pair in Paxton Lake, Texada Island, British Columbia. *Canadian Journal of*  
557 *Zoology*, 70, 361–369.

558

559 Miller, S. E., Barrueto, M., and Schluter, D. 2017. A comparative analysis of experimental  
560 selection on the stickleback pelvis. *Journal of Evolutionary Biology*, 30(6), 1165-1176.

561

562 Nagel, L., and D. Schluter. 1998. Body size, natural selection and speciation in sticklebacks.  
563 *Evolution*, 52, 209–218.

564

565 Nelson, J. S. (1969). Geographic variation in the brook stickleback, *Culaea inconstans*, and notes  
566 on nomenclature and distribution. *Journal of the Fisheries Board of Canada*, 26(9), 2431-  
567 2447.

568

- 569 Nelson, J. S. (1977). Evidence of a genetic basis for absence of the pelvic skeleton in brook  
570 stickleback, *Culaea inconstans*, and notes on the geographical distribution and origin of the  
571 loss. Journal of the Fisheries Board of Canada, 34(9), 1314-1320.  
572
- 573 Nelson, J. S., and Atton, F. M. 1971. Geographic and morphological variation in the presence  
574 and absence of the pelvic skeleton in the brook stickleback, *Culaea inconstans* (Kirtland),  
575 in Alberta and Saskatchewan. Can. J. Zool. 49(3): 343-352.  
576
- 577 Peilou, E. C. 1991. *After the Ice Age: The Return of Life to Glaciated North America*. Chicago,  
578 IL: University of Chicago Press.  
579
- 580 Post, D. M. 2002. Using stable isotopes to estimate trophic position: models, methods, and  
581 assumptions. Ecology, 83(3), 703–718.  
582
- 583 R Core Team. 2017. R: A language and environment for statistical computing. R Foundation for  
584 Statistical Computing, Vienna, Austria. URL: <https://www.R-project.org>.  
585
- 586 Reimchen, T.E., 1994. Predators and morphological evolution in threespine stickleback, pp. 240–  
587 276 in *The Evolutionary Biology of the Threespine Stickleback*, edited by M.A. Bell & S.A.  
588 Foster. Oxford University Press, Oxford, UK.  
589
- 590 Reimchen, T. E., Steeves, D., & Bergstrom, C. A. (2016). Sex matters for defence and trophic  
591 traits of threespine stickleback. *Evolutionary Ecology Research*, 17(4), 459-485.

592

593 Reimchen, T. E., Stinson, E. M., & Nelson, J. S. (1985). Multivariate differentiation of parapatric  
594 and allopatric populations of threespine stickleback in the Sangan River watershed, Queen  
595 Charlotte Islands. *Canadian Journal of Zoology*, 63(12), 2944-2951.

596

597 Reisman, H. M., and Cade, T. J. 1967. Physiological and behavioral aspects of reproduction in the  
598 brook stickleback, *Culaea inconstans*. *American Midland Naturalist*, 77:275-295.

599

600 Reist, J. D. 1980a. Selective predation upon pelvic phenotypes of brook stickleback, *Culaea*  
601 *inconstans*, by northern pike, *Esox lucius*. *Canadian Journal of Zoology*, 58(7), 1245-1252.

602

603 Reist, J. D. 1980b. Predation upon pelvic phenotypes of brook stickleback, *Culaea inconstans*,  
604 by selected invertebrates. *Canadian Journal of Zoology*, 58(7), 1253-1258.

605

606 Reist, J. D. 1983. Behavioural variation in pelvic phenotypes of brook stickleback, *Culaea*  
607 *inconstans*, in response to predation by northern pike, *Esox lucius*. *Environmental Biology*  
608 *of Fishes*, 8(3-4), 255-267.

609

610 Rennison, D. J., Rudman, S. M., & Schluter, D. (2019). Genetics of adaptation: experimental test  
611 of a biotic mechanism driving divergence in traits and genes. *Evolution letters*, 3(5), 513-  
612 520.

613

- 614 Rohlf, F. J. 2018. *tpsDIG* (Version 2.3). Stony Brook, NY: Department of Ecology and  
615 Evolution, State University of New York.  
616
- 617 Rohlf, F. J. 2019. *tpsUtil32* (Version 1.79). Stony Brook, NY: Department of Ecology and  
618 Evolution, State University of New York.  
619
- 620 Ross, J., and Kyba, D. 2015. *The David Thompson Highway Hiking Guide – 2nd Edition*. Rocky  
621 Mountain Books Ltd., Calgary, Canada.  
622
- 623 Ridgeway, M. S., and J. D. McPhail. 1984. Ecology and evolution of sympatric sticklebacks  
624 (*Gasterosteus*): mate choice and reproductive isolation in the Enos Lake species pair.  
625 *Canadian Journal of Zoology*, 62,1813–1818.  
626
- 627 Rundle, H. D., L. Nagel, J. W. Boughman, and D. Schluter. 2000. Natural selection and parallel  
628 speciation in sympatric sticklebacks. *Science*, 287, 306–308.  
629
- 630 Schluter, D., and J. D. McPhail. 1992. Ecological character displacement and speciation in  
631 sticklebacks. *American Naturalist*, 140, 85–108.  
632
- 633 Spoljaric, M. A., & Reimchen, T. E. (2008). Habitat-dependent reduction of sexual dimorphism  
634 in geometric body shape of Haida Gwaii threespine stickleback. *Biological Journal of the*  
635 *Linnean Society*, 95(3), 505-516.  
636

- 637 Taugbol, A., Junge, C., Quinn, P. T., Herland, A., and Vollestad, L. A. 2014. Genetic and  
638 morphometric divergence in threespine stickleback in the Chignik catchment, Alaska.  
639 *Ecology and Evolution*, 4(2), 144-156.
- 640
- 641 Trueman, C. N., McGill, R. A. R. , and Guyard, P. H. 2005. The effect of growth rate on tissue-  
642 diet isotopic spacing in rapidly growing animals. An experimental study with Atlantic  
643 salmon (*Salmo salar*). *Rapid Communications in Mass Spectrometry*, 19, 3239–3247.
- 644
- 645 Ward, J. L., & McLennan, D. A. (2009). Historical and ecological correlates of body shape in the  
646 brook stickleback, *Culaea inconstans*. *Biological Journal of the Linnean Society*, 96(4),  
647 769-783.
- 648
- 649 Webster, M. M., Atton, N., Hart, P. J., and Ward, A. J. 2011. Habitat-specific morphological  
650 variation among threespine sticklebacks (*Gasterosteus aculeatus*) within a drainage basin.  
651 *PloS one*, 6(6), e21060.
- 652
- 653 Willacker, J. J., von Hippel, F. A., Wilton, P. R., and Walton, K. M. 2010. Classification of  
654 threespine stickleback along the benthic-limnetic axis. *Biological journal of the Linnean*  
655 *Society. Linnean Society of London*, 101(3), 595–608.
- 656
- 657 Xie, K.T., Wang, G., Thompson, A. C., Wucherpfennig, J. I., Reimchen, T. E., MacColl, A.D.C.,  
658 Schluter, D., Bell, M. A., Vasquez, K. M., and Kingsley, D. M. 2019. DNA fragility in the  
659 parallel evolution of pelvic reduction in stickleback fish. *Science*, 363(6422), 81–84.

660

661 Yack, J. E., & Fullard, J. H. (2000). Flapping ears. *Current Biology*, 10(7), R257.

662

663 Zanden, M. J. V., Shuter, B. J., Lester, N., and Rasmussen, J. B. 1999. Patterns of Food Chain

664 Length in Lakes: A Stable Isotope Study. *The American Naturalist*, 154(4), 406-416.

665

666 **Table 1.** Summary of samples analyzed in this study. Morphological analyses focused on  
 667 samples from 2017, whereas analysis of stable isotopes only included samples from 2019. For all  
 668 analyses described in the text, the vestigial and absent pelvic phenotypes were combined into a  
 669 single “reduced” phenotypic category. All statistical analyses used type III sums of squares to  
 670 account to unbalanced sampling.

|             | Spined | Pelvic Phenotype |        |
|-------------|--------|------------------|--------|
|             |        | Vestigial        | Absent |
| 2017        |        |                  |        |
| Muir Lake   |        |                  |        |
| Littoral    |        |                  |        |
| female      | 20     | 1                | 24     |
| male        | 24     | 1                | 18     |
| Shunda Lake |        |                  |        |
| Littoral    |        |                  |        |
| female      | 20     | 24               | 9      |
| male        | 29     | 6                | 3      |
| 2019        |        |                  |        |
| Muir Lake   |        |                  |        |
| Littoral    |        |                  |        |
| female      | 3      | 0                | 4      |
| male        | 16     | 0                | 15     |
| Limnetic    |        |                  |        |
| female      | 0      | 0                | 3      |
| male        | 6      | 1                | 10     |
| Shunda Lake |        |                  |        |
| Littoral    |        |                  |        |
| female      | 14     | 11               | 4      |
| male        | 18     | 9                | 2      |

671

672 **Table 2.** ANOVA table for the linear model fitted to whole-body 2D morphology for brook  
 673 stickleback collected in 2017.

|             | df | Type III SS | F      | p                  |
|-------------|----|-------------|--------|--------------------|
| Log(length) | 1  | 0.004158    | 4.4343 | <b>0.0008</b>      |
| Lake        | 1  | 0.008727    | 9.3065 | <b>&lt; 0.0001</b> |



|                         |     |          |         |                    |
|-------------------------|-----|----------|---------|--------------------|
| Sex                     | 1   | 0.014800 | 15.7835 | <b>&lt; 0.0001</b> |
| Pelvic phenotype        | 1   | 0.002982 | 3.1796  | <b>0.0086</b>      |
| Lake * Sex              | 1   | 0.001971 | 2.1021  | 0.0532             |
| Lake * Pelvic phenotype | 1   | 0.003046 | 3.2482  | <b>0.0075</b>      |
| Sex * Pelvic phenotype  | 1   | 0.000754 | 0.8043  | 0.5432             |
| Residuals               | 171 | 0.160345 |         |                    |

674

675 **Table 3.** ANOVA table for the linear model fitted to head-only 2D morphology for brook

676 stickleback collected in 2017 and 2019.

|                         | df | Type III SS | F      | p                  |
|-------------------------|----|-------------|--------|--------------------|
| Log(length)             | 1  | 0.02024     | 6.5175 | <b>&lt; 0.0001</b> |
| Year                    | 1  | 0.01697     | 5.4632 | <b>0.0004</b>      |
| Sex                     | 1  | 0.01019     | 3.2824 | <b>0.0055</b>      |
| Lake                    | 1  | 0.02118     | 6.8201 | <b>&lt; 0.0001</b> |
| Pelvic phenotype        | 1  | 0.00174     | 0.5593 | 0.8024             |
| Year * Sex              | 1  | 0.00179     | 0.5761 | 0.7905             |
| Year * Lake             | 1  | 0.02082     | 6.7046 | <b>&lt; 0.0001</b> |
| Year * Pelvic phenotype | 1  | 0.01321     | 4.2533 | <b>0.0013</b>      |
| Sex * Lake              | 1  | 0.00565     | 1.8186 | 0.0819             |

|                         |     |         |        |               |
|-------------------------|-----|---------|--------|---------------|
| Sex * Pelvic phenotype  | 1   | 0.00239 | 0.7698 | 0.5975        |
| Lake * Pelvic phenotype | 1   | 0.00721 | 2.3214 | <b>0.0322</b> |
| Residuals               | 283 | 0.87888 |        |               |

677

678 **Table 4.** ANOVA table for the generalized linear model fitted to  $\delta^{13}\text{C}$  isotopic signature for  
679 brook stickleback collected in 2019.

|                         | df | Type III SS | F        | p                  |
|-------------------------|----|-------------|----------|--------------------|
| Lake                    | 1  | 527.5       | 848.4586 | <b>&lt; 0.0001</b> |
| Pelvic phenotype        | 1  | 0.29        | 0.4613   | 0.49873            |
| Sex                     | 1  | 0.64        | 1.0329   | 0.31214            |
| Length                  | 1  | 4.69        | 7.5448   | <b>0.00724</b>     |
| Lake * pelvic phenotype | 1  | 2.97        | 4.7848   | <b>0.03125</b>     |
| Residuals               | 92 | 57.2        |          |                    |

680

681 **Table 5.** ANOVA table for the generalized linear model fitted to  $\delta^{15}\text{N}$  isotopic signature for  
682 brook stickleback collected in 2019.

|                  | df | Type III SS | F      | p               |
|------------------|----|-------------|--------|-----------------|
| Lake             | 1  | 3.009       | 5.4621 | <b>0.021628</b> |
| Pelvic phenotype | 1  | 0.299       | 0.542  | 0.463479        |
| Sex              | 1  | 1.965       | 3.5674 | 0.06211         |
| Length           | 1  | 0.944       | 1.7137 | 0.193798        |

|                        |    |       |        |                 |
|------------------------|----|-------|--------|-----------------|
| Lake * length          | 1  | 2.872 | 5.2133 | <b>0.024742</b> |
| Pelvic phenotype * Sex | 1  | 4.477 | 8.1275 | <b>0.005394</b> |
| Residuals              | 91 | 50.13 |        |                 |

683



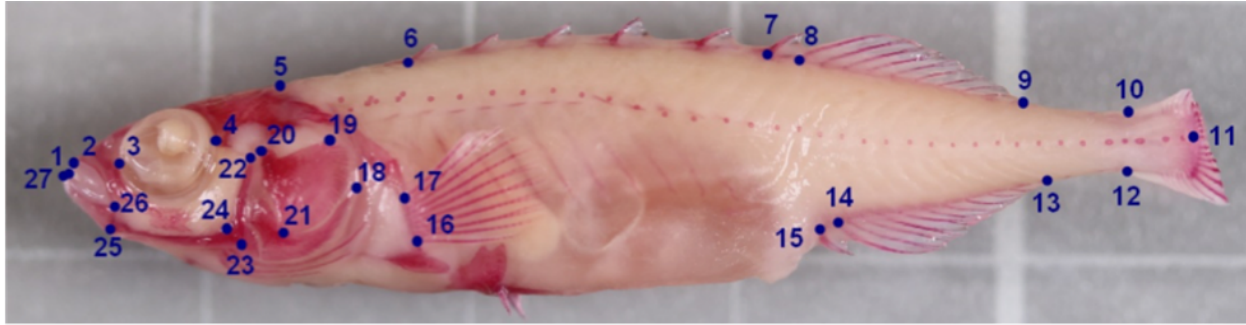

685

686 **Figure 1.** Position of 27 morphological landmark locations on a brook stickleback specimen (n =  
687 105). 1) Anterior ventral tip of upper lip, 2) Anterior dorsal tip of upper lip, 3) Anterior border or  
688 the eye, 3) Posterior border of the eye, 4) Posterior dorsal tip of skull, 5) Base of first dorsal  
689 spine, 6) Base of last dorsal spine, 7) Anterior junction of the dorsal fin, 9) Posterior junction of  
690 the dorsal fin, 10) Dorsal insertion of the caudal fin, 11) Posterior end of the hypural plate at the  
691 midline, 12) Anterior insertion of the caudal fin, 13) Posterior junction of the anal fin, 14)  
692 Anterior junction of the anal fin, 15) Base of anal spine, 16) Anterior tip of the pectoral fin, 17)  
693 Dorsal tip of the pectoral fin, 18) Dorsal tip of the gill cover, 19) Posterior dorsal tip of  
694 operculum, 20) Anterior dorsal tip of operculum, 21) Ventral tip of operculum, 22) Dorsal tip of  
695 preoperculum, 23) Posterior angular tip of preoperculum, 24) Posterior jaw, 25) Anterior tip  
696 ventral jaw, 26) Posterior tip of lips, 27) Anterior tip of lower lip. Landmarks 7 through 15 were  
697 unavailable for samples collected in 2019.

698

699

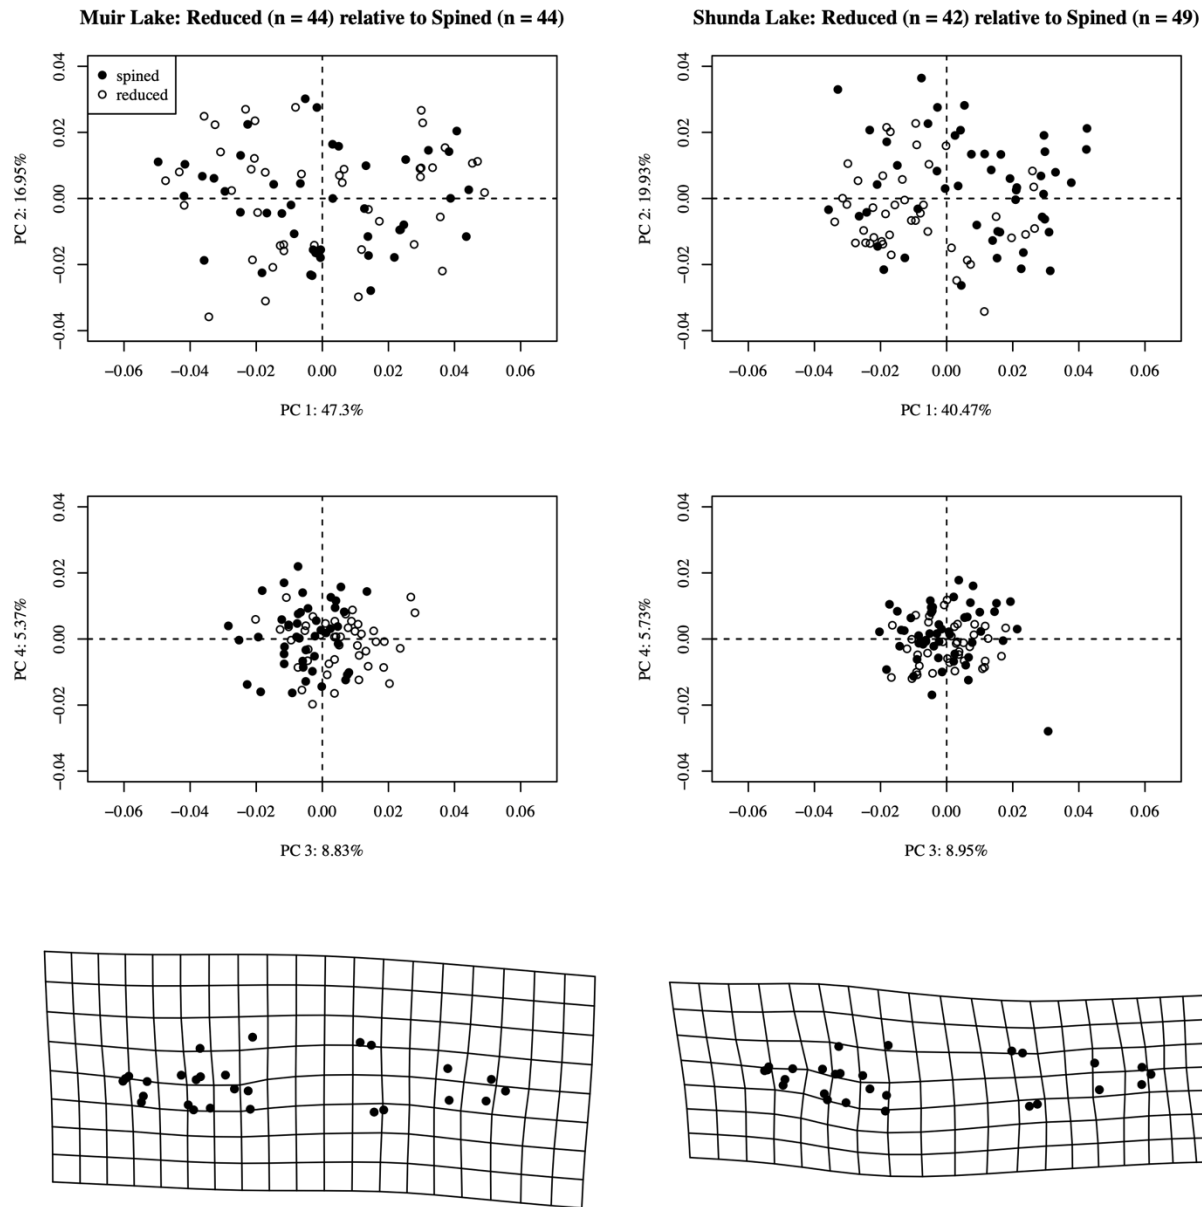

700

701 **Figure 2.** The effect of pelvic phenotype on body morphology in brook stickleback from Muir  
702 Lake (left column) and Shunda Lake (right column). The top two plots in each column show the  
703 results of principle components analyses for each lake. Values for each individual fish for the  
704 first four principle components (PCs) are shown with the proportion variance in body  
705 morphology explained by each PC shown on the axis labels. The bottom plot in each column  
706 shows the distortion of a symmetrical (square) grid when the average shape of a brook  
707 stickleback with a reduced pelvic phenotype is superimposed on the average shape of a brook  
708 stickleback with a complete pelvic structure.

709

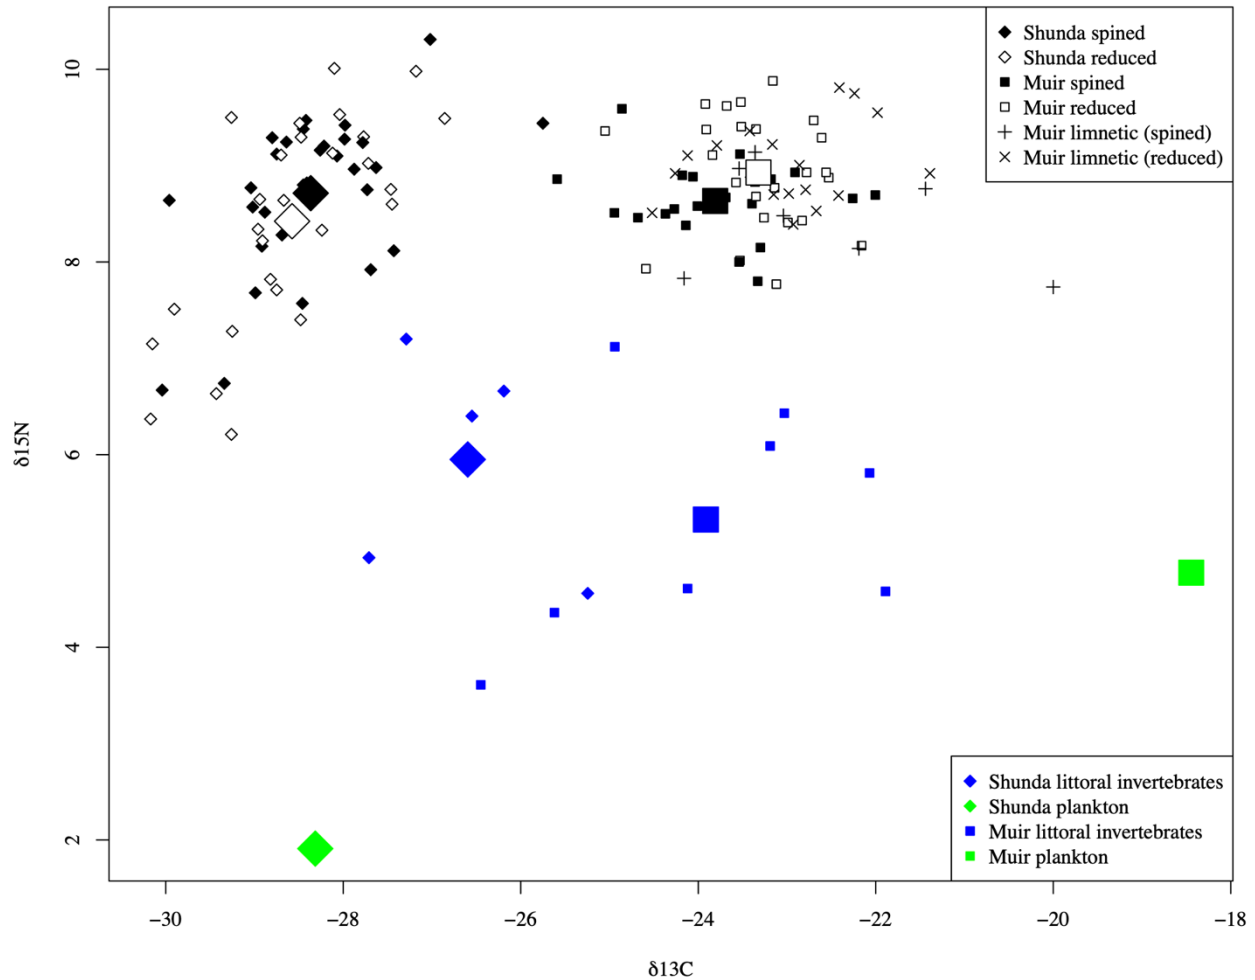

710

711 **Figure 3.** Carbon and nitrogen stable isotope signatures for spined and unspined brook  
712 stickleback, zooplankton, and benthic littoral macroinvertebrates from Muir Lake and Shunda  
713 lake. Macroinvertebrate taxa represented in the plot include caddisfly larvae in the family  
714 Limnephilidae, unidentified caddisfly larvae, amphipods, leaches, dragonfly larvae in the family  
715 Gomphidae, unidentified dragonfly larvae, unidentified snails, and unidentified damselfly larvae.  
716 Also shown (with + and x symbols) are limnetic-caught brook stickleback from Muir Lake. All  
717 fish were caught in the littoral zone unless otherwise indicated. The larger symbols represent  
718 mean values for each subgroup (excluding limnetic-caught), whereas the smaller symbols  
719 represent values for individuals.

720

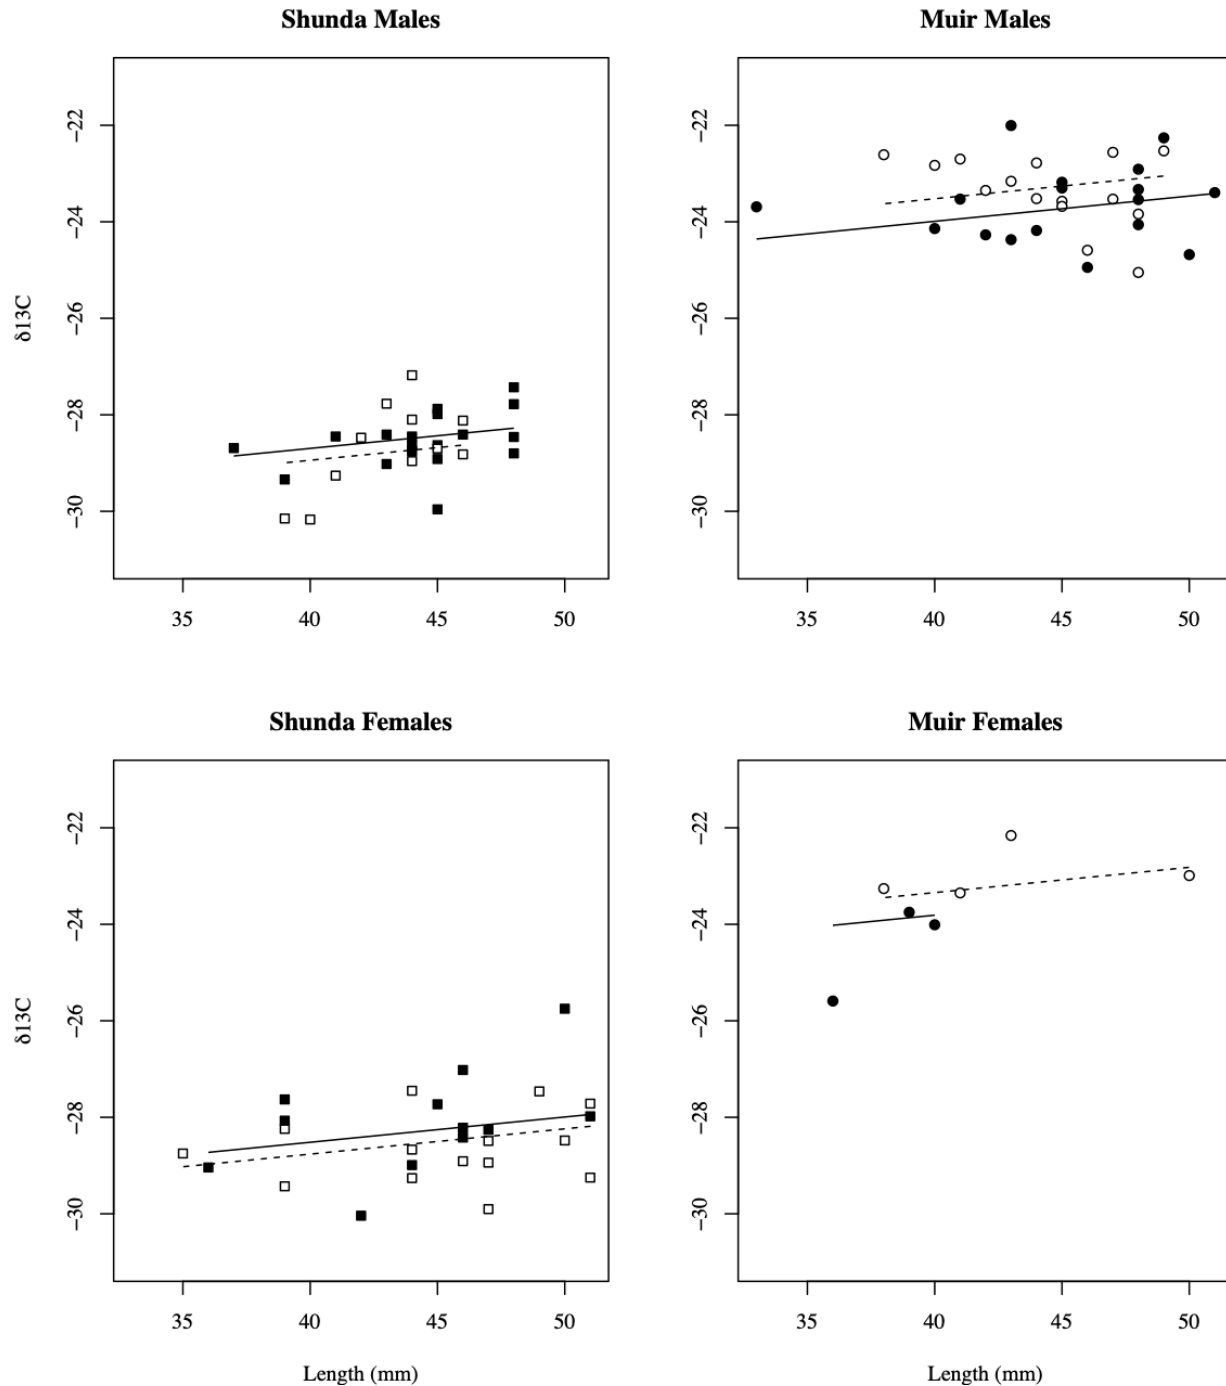

721

722 **Figure 4.** Summary of the effects of sex, lake, pelvic phenotype, and fish size on  $\delta^{13}C$  isotope signature in brook stickleback.  
723 As in Figure 3, closed symbols represent spined fish and open  
724 symbols represent fish with reduced pelvic phenotypes. Lines show the linear relationships  
725 inferred from the model described in the text and in Table 4 (solid = spined, dashed = reduced).  
726



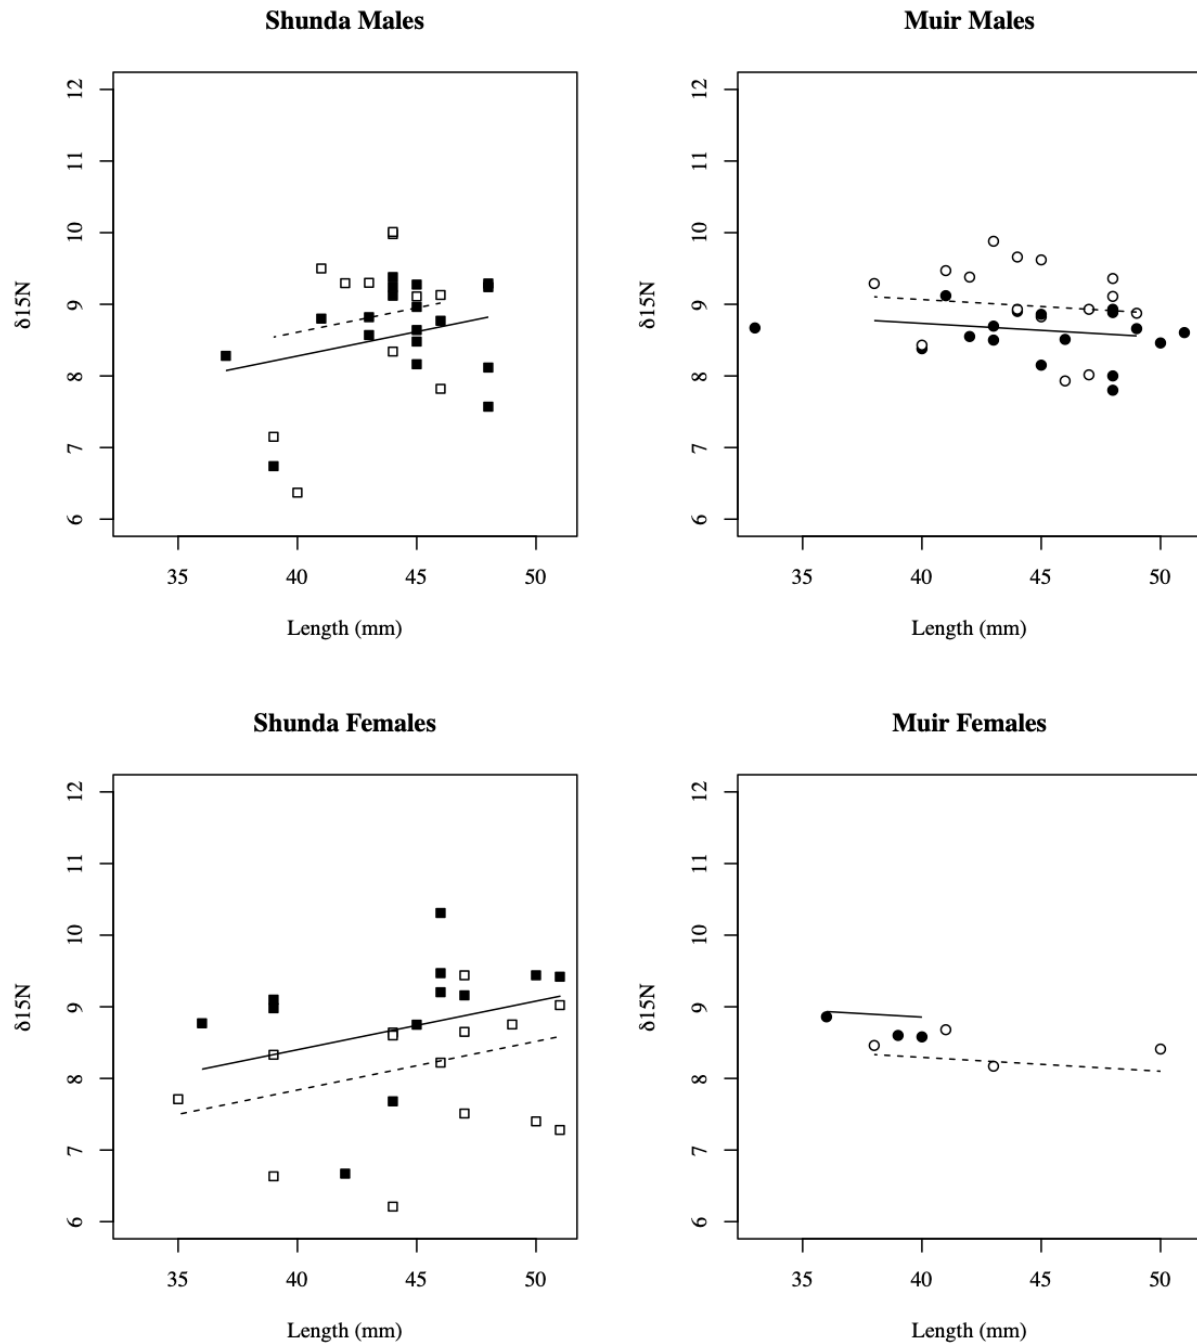

727

728 **Figure 5.** Summary of effects of sex, lake, pelvic phenotype, and fish size on  $\delta^{15}\text{N}$  isotope  
729 signature in brook stickleback. As in Figure 3, closed symbols represent spined fish and open  
730 symbols represent fish with reduced pelvic phenotypes. Lines show the linear relationships  
731 inferred from the model described in the text and in Table 5 (solid = spined, dashed = reduced).  
732
